# Supplementary material for: The Effect of Microbial Fertilizer on the Growth, Rhizospheric Environment and Medicinal Quality of Fritillaria taipaiensis
Source: MDPI journal article supplement (doi:10.3390/horticulturae7110500), 2021-11-15
Supplement: s1 [file s1]

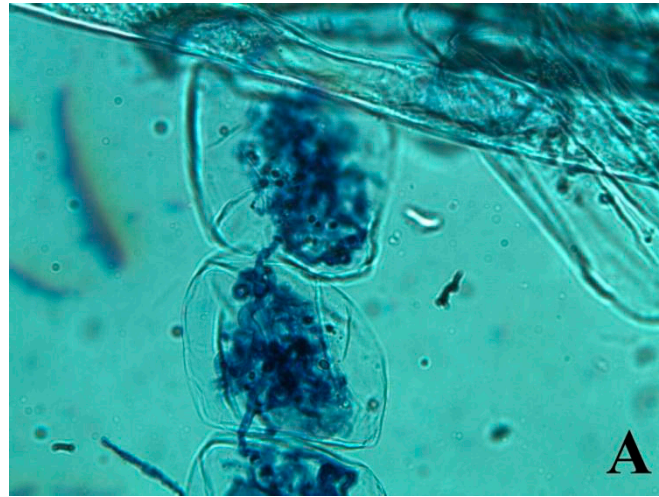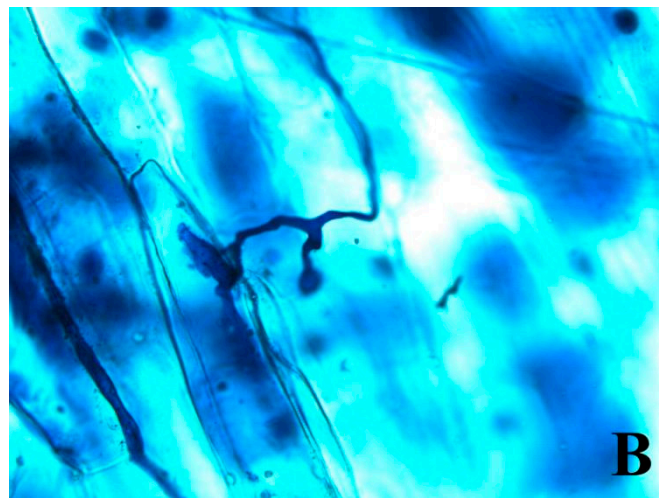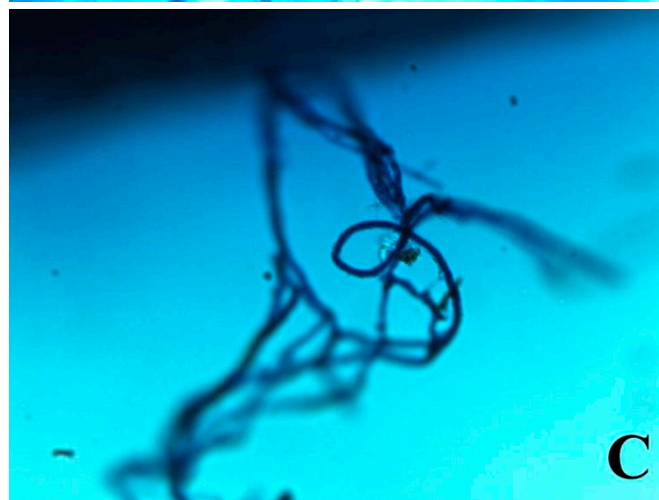

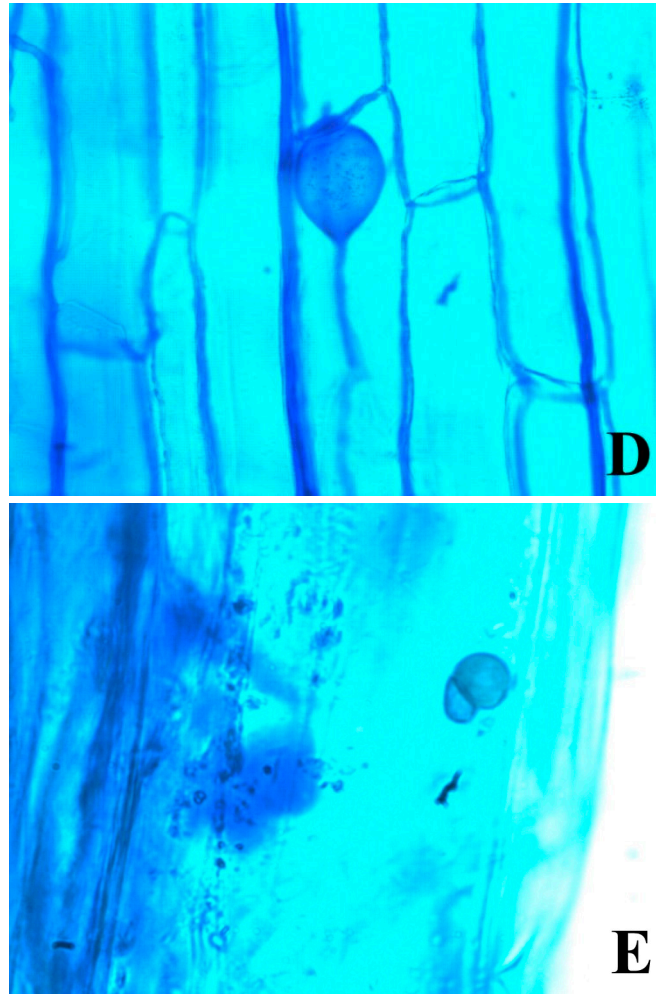

**Figure S1.** Mycorrhizal structure in the *F. taipaiensis* root system. (A) arbuscular, (B) endophytic hyphae, (C) external hyphae, (D) vesicle and (E) spore.
